# RAFTS3: Rapid Alignment-Free Tool for Sequence Similarity Search

Ricardo Assunção Vialle<sup>1\*</sup>, Fábio de Oliveira Pedrosa<sup>2</sup>, Vinicius Almir Weiss<sup>1</sup>, Dieval Guizelini<sup>1</sup>, Juliana Helena Tibaes<sup>1</sup>, Jeroniza Nunes Marchaukoski<sup>1</sup>, Emanuel Maltempi de Souza<sup>2</sup>, Roberto Tadeu Raittz<sup>1</sup>

<sup>1</sup>Laboratory of Bioinformatics, Sector of Professional and Technological Education, Federal University of Paraná, Curitiba, Paraná, Brazil.

<sup>2</sup>Department of Biochemistry and Molecular Biology, Federal University of Paraná, Curitiba, Paraná, Brazil.

E-mails: Ricardo Assunção Vialle<sup>1\*</sup> - [ricardovialle@gmail.com](mailto:ricardovialle@gmail.com)  
Fábio de Oliveira Pedrosa<sup>2</sup> - [fpedrosa@ufpr.br](mailto:fpedrosa@ufpr.br)  
Vinicius Almir Weiss<sup>1</sup> - [viniciusweiss@gmail.com](mailto:viniciusweiss@gmail.com)  
Dieval Guizelini<sup>1</sup> - [dievalg@gmail.com](mailto:dievalg@gmail.com)  
Juliana Helena Tibaes<sup>1</sup> - [tibaes.juliana@gmail.com](mailto:tibaes.juliana@gmail.com)  
Jeroniza Nunes Marchaukoski<sup>1</sup> - [jeroniza@gmail.com](mailto:jeroniza@gmail.com)  
Emanuel Maltempi de Souza<sup>2</sup> - [souzaem@ufpr.br](mailto:souzaem@ufpr.br)  
Roberto Tadeu Raittz<sup>1</sup> - [raittz@gmail.com](mailto:raittz@gmail.com)

Corresponding author: Ricardo Assunção Vialle<sup>1\*</sup>, [ricardovialle@gmail.com](mailto:ricardovialle@gmail.com)

**Keywords:** alignment-free; sequence comparison; protein sequence comparison; genome annotation.

**ABSTRACT** (words counted: 159 / limit: 350)

**Background:** Similarity search of a given protein sequence against a database is an essential task in genome analysis. Sequence alignment is the most used method to perform such analysis. Although this approach is efficient, the time required to perform searches against large databases is always a challenge. Alignment-free techniques can offer alternatives for comparing sequences without the need of alignment.

**Results:** Here we present RAFTS3, a fast protein similarity search tool that uses a candidate selection step based on shared k-mers and a comparison measure using a binary co-occurrence matrix of amino acid residues. RAFTS3 performed searches many times faster than those with BLASTp against large protein databases, such as NR, Pfam or UniRef, with a small loss of sensitivity depending on the similarity degree of the sequences.

**Conclusions:** RAFTS3 offers a new alternative for fast comparison of protein sequences, genome annotation and biological data mining. The source code and the standalone files for Windows and Linux platform are available at: <https://sourceforge.net/projects/rafts3/>

## BACKGROUND

Biological data mining deals with the discovery of patterns, trends, answers, or other meaningful information that is hidden in the data. Sequence comparison is the main component in the retrieval system from genomic databases. An efficient sequence comparison algorithm is critical for searching biological databases. Usually, bioinformatics workflows use algorithms based on sequence alignment such as BLAST [1] to search for similarity of DNA/RNA or protein sequences against large sequence databases. Comparisons involving large databases such as NCBI NR [2], however, are computationally costly and demand long running times. The development of new computationally faster algorithms may provide significant improvement in biological pattern search. A class of techniques that can speed up sequence comparison is the alignment-free approach [3].

Algorithms based on sequence alignment are efficient in detecting similarities between protein sequences. These approaches have been improved since the first methods. Originally alignment techniques used dynamic programming to produce an optimized alignment between the sequences. Although efficient implementations have been developed, the computational load to compare large amounts of sequences makes these algorithms very slow and demanding [3,4]. To compensate for the high computational cost of full alignments, heuristic approaches were proposed. In general, these methods use subsequences of pre-determined length "k" (k-mers). The subject database is searched to find sequences that have common k-mers related to the query sequence. The k-mers are then extended using scores schemes to maximize the aligned regions. However, although heuristic methods are somewhat efficient to perform searches in large databases, they also have their limitations, such as loss of sensitivity and parameter thresholds [4].

The alignment-free methods offer a way to obtain a similarity measure between sequences without the need to perform alignments. These methods are also based on the assumption that two similar sequences share a certain portion of k-mers. Given a query sequence, the alignment-free methods generally work by selecting subject

sequences with k-mers that are present in both query and subject sequences. The procedure then applies a statistical method to establish a similarity ranking for these sequences [5].

Generally, alignment-free techniques are divided in two classes: a) methods based on words (sequences) with fixed sizes, followed by the use of statistical analysis including procedures based on defined metrics such as Euclidean distance and entropy of frequency distributions; and b) methods where words of fixed sizes are not required for statistical analysis, using data compression and/or Kolmogorov complexity scale independent representations by iterated maps. Reviews of these techniques are available at [3,5,6].

Several alignment-free techniques have been proposed with different degrees of success. The very first proposal of an alignment-free method for biological sequence comparison showed to be superior to alignment based algorithms in some aspects such as the ability to compare low similarity sequences [7]. Since then, it has been applied in phylogenetic reconstruction [8–11], identification of homologous proteins [4], genome annotation [12], classification of metagenomic sequences [13], and identification of regulatory sequences [14]. Also, it has been shown as an efficient technique for sequence filtering [15].

Alignment-free approaches have been used to replace alignment based approaches for searching and comparing sequences against large databases showing significant increase in speed. PAUDA [16] is an alternative to BLASTx for searching sequencing reads against protein databases in metagenomics. PVC (Periodicity Count Value) is a method for finding homologous nucleotide sequences as alternative for BLASTn [17]. USEARCH [18] is an alternative to BLASTp that applies a k-mer approach to perform searches of protein sequences against a protein database.

In this paper we propose a fast and efficient alignment-free method named RAFTS3. The method is based on amino acid co-occurrence matrices and on a new heuristic approach for filtering sequences. The results show that RAFTS3 is much faster than BLASTp with negligible loss of sensitivity when applied against large

databases in all tests performed and can be successfully used in several biological data-mining tasks.

## **IMPLEMENTATION**

Since RAFTS3 deals with protein sequence comparison against protein databases, the first step to be considered is to set up the protein database into a specific RAFTS3 format. The formatting consists of two steps to be applied to each protein sequence within a FASTA file: a) the sequences must be indexed by a hash function and b) a binary amino acid co-occurrence matrix (BCOM) has to be assigned to each sequence to represent its contents.

When a formatted database is available, query searches can be performed. This process is also divided in two distinct steps: (1) the filtering of candidates, that selects sequences whose indexed k-mers are shared with the query sequence, and (2) the comparison of these candidates, that is done by means of the BCOM.

### **Database formatting process**

The formatting process takes a FASTA database as input and creates a file comprising a hash table and the BCOM matrices for all sequences in the database. Aiming to improve access to the sequences, RAFTS3 also creates an index to allow direct access to each sequence in the FASTA file (Figure 1.A).

For each sequence in the database a set of k-mers is randomly selected and submitted to a hash function. The indexes are then stored into a hash table for fast selection of candidate for comparison. These indexes will permit further retrieval of any sequence in the database sharing a given k-mer. As default, 10 k-mers with lengths of 6 amino acid residues are selected per sequence.

The formatting process also involves a BCOM assignment to each sequence. The BCOM was designed to represent the sequences using few bytes of memory. Both the hash table and the BCOM matrices are stored in a common structure that is loaded

in RAM with the application aiming to minimize disk access when comparing sequences. The hash function and the BCOM structure will be detailed further.

### Query sequence search

Searching is the goal step in RAFTS3. Its purpose is to retrieve similar sequences to a sequence of interest from a database. Also, it is desirable that the recovered sequences are ranked by their similarity with the query sequence. Searching involves two main steps: filtering and comparison.

In the filtering process, the search scope is reduced by selecting, through a hash table, only sequences containing common k-mers related to the query sequence. To perform a search based on a sequence of a given length  $n$ , hash indexes for all possible k-mers with length  $k$  are calculated by taking a sliding window that runs through the sequence from position 1 to  $n - k + 1$ . The indexes generated for each k-mer are used to select the candidate sequences by consulting the hash table (Figure 1.B).

The comparison is performed with the candidate sequences based on their BCOM. The details of the comparison method will be discussed later (see Binary co-occurrence matrix (BCOM)). Alignments of the best results can also be done to confirm the results or to assign them to a well-established metric. The number of alignments can be customized by parameters; by default, a Smith-Waterman alignment [19] is performed only with the best stated result. As a measure of alignment quality, besides the alignment score, we calculate a relative score  $E$  (1) [20]:

$$E = \frac{\text{alignment score of } S_1 \text{ with } S_2}{\text{alignment score of } S_1 \text{ with } S_1} \quad (1)$$

where  $S_1$  and  $S_2$  are protein sequences. E-values are also computed using Karlin Altschul statistics [21].

### Hash function for candidate sequence selection

The hash function of RAFTS3 is an essential step in the filtering process and it is applied to both database and query. The recursive indexing technique (INREC) [22]

was used to assign a real number to a protein k-mer. INREC is a technique of dimensionality reduction and pattern recognition that uses a recursive process of a mathematical function to encapsulate, in a single number, the information that describes a pattern. Thereby, the indexes generated by similar sequences are equal or close to each other. The numbers generated by the INREC function are transformed in hash indexes  $H$  through the expression (2).

$$H = \text{mod}(\text{INREC}(k\text{-mer}) \times \text{largenumber}, \text{dbsize}) \quad (2)$$

Where *largenumber* is a value to express the decimal fraction of the INREC index as an integer number, and *dbsize* defines size and spreading of the hash table. By using the hash table, sequences sharing the same INREC indexes are rapidly selected as candidate for comparison.

To apply the INREC algorithm, amino acid residues need to be converted to a quaternary numeral system triplet by a two-way conversion table (Table 1). The numbers are arbitrary, but the codes are assigned in correspondence to possible codons. The numerals 1, 2, 3 and 4 represent the nucleotide residues A, C, G and T/U, respectively.

Thus, given a sequence of integers  $D = \{d_1, d_2, \dots, d_m\}$  representing a sequence of length  $m$ , where  $d_i \in \{1, 2, 3, 4\}$ . The INREC index  $I$  is generated from the recursion of the function  $f$ :

$$I = f(d_1 f(d_2 \dots f(d_m))) \quad (3)$$

where,

$$f(d_i) = \tanh\left(\sqrt{\left(\frac{d_i}{4}\right)^{-1}}\right) \quad (4)$$

The amino acid sequence *MAF* can be used to illustrate how the indexing works. By using the conversion table (Table 1) the amino acids are represented as  $M = \{1, 4, 3\}$ ,  $A = \{3, 2, 4\}$  and  $F = \{4, 4, 2\}$ . Thus, the sequence *MAF* can be

represented as  $D = \{1, 4, 3, 3, 2, 4, 4, 4, 2\}$ . Applying the  $f$  function recursively (4 and 3), from the last element to the first:

$$\text{for } i = 9, d_i = 2, f(2) = 0.88$$

$$\text{for } i = 8, d_i = 4, f(4 \times f(2)) = 0.78$$

$$\text{for } i = 7, d_i = 4, f(4 \times f(4 \times f(2))) = 0.81$$

$$\text{for } i = 6, d_i = 1, f(1 \times f(4 \times f(4 \times f(2)))) = 0.80$$

$$\text{for } i = 5, d_i = 2, f(2 \times f(1 \times f(4 \times f(4 \times f(2)))) = 0.91$$

$$\text{for } i = 4, d_i = 3, f(3 \times f(2 \times f(1 \times f(4 \times f(4 \times f(2)))) = 0.83$$

$$\text{for } i = 3, d_i = 3, f(3 \times f(3 \times f(2 \times f(1 \times f(4 \times f(4 \times f(2)))) = 0.85$$

$$\text{for } i = 2, d_i = 4, f(4 \times f(3 \times f(3 \times f(2 \times f(1 \times f(4 \times f(4 \times f(2)))) = 0.79$$

$$\text{for } i = 1, d_i = 1,$$

$$f(1 \times f(4 \times f(3 \times f(3 \times f(2 \times f(1 \times f(4 \times f(4 \times f(2)))) = 0.97$$

Therefore, for the sequence *MAF*, the INREC index  $I$  is 0.97.

### Binary co-occurrence matrix (BCOM)

The binary co-occurrence matrix BCOM is a bi-dimensional fingerprint of an amino acid sequence. It not only represents an amino acid sequence but is a pattern for comparison with other sequences.

A BCOM is a binary matrix where each cell position  $(x, y)$  represents the occurrence of an amino acid pair  $XY$  in a sequence  $S$ . If the value within the cell is set to null, the pair does not occur in  $S$  (Figure 2). Thus for each sequence a 20x20 binary matrix is generated representing the occurrence of all possible amino acid pairs within it. Thereby, any sequence can be represented by a matrix with 400 bits or 50 bytes. The small data volume and the uniform structure of the BCOM allows databases



with millions of sequences to be represented and stored in RAM. The entire NR database can be handled in a common laptop.

To compare two matrices, let  $A$  and  $B$  be BCOMs corresponding to sequences  $S_1$  and  $S_2$  respectively. The binary sum between the matrices  $A$  and  $B$  represents the occurrence of common amino acid residue pairs and reflects the sequences similarity. Similarly, the binary operation  $xor$  is performed to calculate the degree of dissimilarity as a support for the comparison. Thus, the measure of difference  $e$  between  $A$  and  $B$  is given by the equation (5).

$$e = \frac{\text{sum}(xor(A, B))}{\text{sum}(and(A, B))} \quad (5)$$

Each candidate sequence selected in the filter step is related to a dissimilarity measure given by  $e$ . Finally, correlation coefficients  $r$  (6) between the matrices are also calculated for BCOMs of sequences with highest similarity based on  $e$  and are used for reordering the results. Correlation coefficients are usually used to compare image differences; here the same was done with the BCOMs as an estimate of sequence identity. For instance, the sequence of the major facilitator superfamily protein of *Serratia* sp. AS12 (gi 333925879) shares about 80% identity with the arabinose efflux permease family protein of *Rahnella aquatilis* (gi 383191252) and the correlation coefficient is 73%; in contrast the amino acid transporter of *Aspergillus oryzae* shares about 20% of identity with the former while the correlation coefficient is 28%.

$$r = \frac{\sum_m \sum_n (A_{mn} - \bar{A})(B_{mn} - \bar{B})}{\sqrt{(\sum_m \sum_n (A_{mn} - \bar{A})^2)(\sum_m \sum_n (B_{mn} - \bar{B})^2)}} \quad (6)$$

Where,  $\bar{A} = \text{Mean}(A)$  and  $\bar{B} = \text{Mean}(B)$ .

Due the computational cost, the number of sequences compared with the correlation equation (6) was limited to 50.

## **Implementation and datasets**

RAFTS3 was written in MATLAB using its built-in functions, the Bioinformatics Toolbox [23] and an in-house library. Three protein databases were used, the NCBI NR with 19,689,576 sequences, PFAM [24] with 15,929,002 sequences and the UniRef50 [25] with 6,784,251 sequences. The performance and sensitivity of RAFTS3 was compared with that of BLASTp version 2.2.26+, USEARCH and PAUDA. Tests were performed using Linux CentOS 6.5 on a Desktop AMD Six-Core 3.5Ghz processor with 8Gb of RAM, configuration details for each test are explained on each results section.

## **RESULTS AND DISCUSSION**

### **Parameters selection analysis**

To determine the default parameters to be used by RAFTS3 for the candidate selection step, sets of 1 to 20 k-mers with 4, 5, 6 or 7 amino acid residues were evaluated using the NR database. A subset of 1000 protein sequences randomly selected from NR was used as query. Two criteria were considered to define the RAFTS3 configuration settings: the running time to search 1000 queries (Figure 3.A); and the number of queries with second best hit with relative score higher than 0.3 (Figure 3.B). The best hit was disregarded since that always corresponds to the query sequence.

The purpose of this procedure was to find the number and size of k-mers to be adopted as default parameters to carry out searches with RAFTS3. This analysis showed that the running times were lower using k-mer sizes of 6 and 7 residues and the number of hits with relative score higher than 0.3 reached a plateau with sets of 10 k-mers per sequence. Thereby, the following parameters were chosen as default: 10 k-mers of 6 amino acid residues per sequence.

## Comparison of RAFTS3 with BLASTp

The sensitivity and running time of the RAFTS3 was compared with BLASTp using 1000 sequences randomly selected from a newer version of NR. These sequences were absent in the database used for search tests and represent sequences from more than 650 different organisms. This comparison simulates an automated annotation task, thus BLASTp and RAFTS3 were configured only to report the best hit for comparison. The sensitivity was evaluated as the number of similar sequences retrieved and the processing time spent in the search by both tools. The number of sequences retrieved by BLASTp was considered as the gold standard, representing 100% of the results.

RAFTS3 showed results from 77% to 95% of sensitivity compared with BLASTp when searching UniRef50 database, from 86% to 95% when searching the Pfam database and from 89% to 97% when searching the NR database, depending on the threshold of the score (Table 2). RAFTS3 showed to be more than 300 times faster than BLASTp when searching in the larger database.

To illustrate the differences between the RAFTS3 and BLASTp hits, three different proteins were searched against the NR database: the pyrR (UniProtAC P39765) of *Bacillus subtilis* that regulates the transcription of the pyrimidine nucleotide (pyr) operon; the PRNP (UniProtAC P04165) of *Homo sapiens* related with neuronal development and synaptic plasticity; and the PSG1 (UniProtAC P11464) of *Homo sapiens* related with female pregnancy. The top 10 hits found by each were selected and the E-value and the relative scores were calculated for comparison. The results showed that, despite some differences, RAFTS3 performed similarly to BLASTp (Table 3, 4 and 5).

To compare the ranking order of sequences given by BLASTp and RAFTS3, 1000 sequences were randomly selected from the dataset to be used as query against the NR database. The position of RAFTS3 best hits were scored among BLASTp top 50 hits and vice-versa. The results showed that 72% of the RAFTS3 best hits occurred within the first 10 BLASTp top results (Supplementary material Table S1), suggesting

that sequences retrieved by RAFTS3 are in most the same or very closely related to that retrieved by BLASTp. To better illustrate the ranking differences between BLASTp and RAFTS3 the top 50 hits identified by RAFTS3 and BLASTp using 5 different proteins randomly selected from the test set as query to search against the NR database are shown in supplementary material Table S2. In all cases, BLASTp best hit was among the 10 best hits of RAFTS3. Interestingly, for steroidogenic factor 1 isoform X2 RAFTS3 top hit had a higher relative score than that of BLASTp (Table S2).

### **Comparison of RAFTS3 with USEARCH**

USEARCH provides freely only a version with limited use of resources, the complete version of requires a paid license. Thereby, we chose to use the small COG [26] database to compare RAFTS3 and USEARCH performances. In this test, USEARCH was faster and more accurate than RAFTS3. However, due to the limitations of the free version, it was not possible to evaluate USEARCH performance searching large databases. It is possible to anticipate that memory consumption of USEARCH will be more than 40Gb for the NR database, while RAFTS3 uses 20 times less. Also RAFTS3 runtime is not much affected by the database size and the sensitivity tends to increase. These considerations indicate that the use of RAFTS3 may be advantageous over USEARCH when searching large databases.

### **Comparison of RAFTS3 with PAUDA**

To compare RAFTS3 with PAUDA an executable was developed to translate DNA sequences in all 6 frames to search on a protein database. We called it RAFST3x (in analogy to BLASTx). The tests were performed comparing 1000 sequences randomly selected from the NT database (lengths from 50 to 3000 pb) against the UniRef50 database. RAFTS3x was 7% faster than PAUDA and more sensitive, yielding twice as many hits above the threshold relative score (Table 6).

## Alignment information

The performance advantage of RAFTS3 relies on the comparison of sequences without the need of alignment. The measure used is based on the BCOM's comparison that have some relationship with an alignment score. It's possible to perform local alignments on the hits reported by RAFTS3 using the Smith-Waterman algorithm, however this adds an additional cost on time. The runtime for RAFTS3 configurations using from 0 to 100 alignments to search the 1000 sequences against the NR database varied from 40 seconds to 17 minutes. Thus this option must be used wisely.

## CONCLUSIONS

RAFTS3 uses an aggressive filter approach with a fast comparison method based on BCOMs. Due to the limitation of the free version of USEARCH, comparisons for searches against large databases could not be performed. The comparison of RAFTS3 with BLASTp showed that RAFTS3 could be used to achieve fast protein similarity searches with a small loss of sensitivity. The sensitivity compared to BLASTp increases with the sequence similarity. RAFTS3 also shows a minimal loss on performance when challenged with larger databases in comparison with BLASTp, as judged by the increase in time to search on UniRef50 compared to NR (almost 3 times as large), the running time for RAFTS3 increased twice while BLASTp increased thrice. Thus RAFTS3 could be especially advantageous when using large databases with many sequences being queried. As the database increases, the filtering options can be made more stringent avoiding the increase of the number of candidate sequences selected and, consequently, of memory usage.

We have demonstrated that the RAFTS3 can perform high-speed protein search comparisons locally using a desktop computer or laptop. RAFTS3 is being used in tasks as genome annotation by our Bioinformatics group at the Federal University of Parana with success and presents a good solution for protein sequence data mining.

## **DECLARATIONS**

### **Availability and requirements**

Project name: RAFTS3

Project home page: <https://sourceforge.net/projects/rafts3/>

Operating system(s): Linux, Windows

Programming language: MATLAB (R2012a)

Other requirements: MCR MATLAB Compiler Runtime v7.17 (only for compiled version)

License: Source code and binaries freely available under the BSD License

Any restrictions to use by non-academics: None

### **Competing interests**

The authors declare that they have no competing interests.

### **Funding**

National Institute of Science and Technologies of Biological Nitrogen Fixation, Fundação Araucária, CAPES and CNPq.

### **Authors' contributions**

RAV implemented the software, validated the results and wrote the manuscript. RTR designed the study and developed the prototype. FOP, VAW, JNM and EMS contributed to the concepts and revised the manuscript. DG contributed to the concepts. JHT contributed to the testing. All authors read and approved the final manuscript.

## REFERENCES

1. Altschul SF, Gish W, Miller W, Myers EW, Lipman DJ. Basic local alignment search tool. *J Mol Biol.* 1990;215: 403–410. doi:10.1016/S0022-2836(05)80360-2
2. Sayers EW, Barrett T, Benson D a, Bolton E, Bryant SH, Canese K, et al. Database resources of the National Center for Biotechnology Information. *Nucleic Acids Res.* 2011;39: D38–51. doi:10.1093/nar/gkq1172
3. Vinga S, Almeida J. Alignment-free sequence comparison--a review. *Bioinformatics.* 2003;19: 513–523. doi:10.1093/bioinformatics/btg005
4. Mahmood K, Webb GI, Song J, Whisstock JC, Konagurthu AS. Efficient large-scale protein sequence comparison and gene matching to identify orthologs and co-orthologs. *Nucleic Acids Res.* 2012;40: e44–e44. doi:10.1093/nar/gkr1261
5. Mantaci S, Restivo A, Sciortino M. Distance measures for biological sequences: Some recent approaches. *Int J Approx Reason.* 2008;47: 109–124. doi:10.1016/j.ijar.2007.03.011
6. Giancarlo R, Scaturro D, Utro F. Textual data compression in computational biology: a synopsis. *Bioinformatics.* 2009;25: 1575–1586. doi:10.1093/bioinformatics/btp117
7. Blaisdell BE. A measure of the similarity of sets of sequences not requiring sequence alignment. *Proc Natl Acad Sci U S A.* 1986;83: 5155–9. Available: <http://www.ncbi.nlm.nih.gov/pubmed/3460087>
8. Huang G, Zhou H, Li Y, Xu L. Alignment-free comparison of genome sequences by a new numerical characterization. *J Theor Biol.* 2011;281: 107–12. doi:10.1016/j.jtbi.2011.04.003
9. Yu C, Cheng S-Y, He RL, Yau SS-T. Protein map: an alignment-free sequence comparison method based on various properties of amino acids. *Gene.* 2011;486: 110–8. doi:10.1016/j.gene.2011.07.002
10. Comin M, Verzotto D. Alignment-free phylogeny of whole genomes using underlying subwords. *Algorithms Mol Biol.* 2012;7: 34. doi:10.1186/1748-7188-7-34
11. Soares I, Goios A, Amorim A. Sequence Comparison Alignment-Free Approach Based on Suffix Tree and L-Words Frequency. *Sci World J.* 2012;2012: 1–4. doi:10.1100/2012/450124
12. Kurtz S, Narechania A, Stein JC, Ware D. A new method to compute K-mer frequencies and its application to annotate large repetitive plant genomes. *BMC Genomics.* 2008;9: 517. doi:10.1186/1471-2164-9-517
13. Ounit R, Wanamaker S, Close TJ, Lonardi S. CLARK: fast and accurate classification of metagenomic and genomic sequences using discriminative k-mers. *BMC Genomics.* 2015;16: 236. doi:10.1186/s12864-015-1419-2
14. Kantorovitz MR, Robinson GE, Sinha S. A statistical method for alignment-free

- comparison of regulatory sequences. *Bioinformatics*. 2007;23: i249–i255.  
doi:10.1093/bioinformatics/btm211
15. Pevzner PA. Statistical distance between texts and filtration methods in sequence comparison. *Bioinformatics*. 1992;8: 121–127. doi:10.1093/bioinformatics/8.2.121
  16. Huson DH, Xie C. A poor man's BLASTX--high-throughput metagenomic protein database search using PAUDA. *Bioinformatics*. 2014;30: 38–39.  
doi:10.1093/bioinformatics/btt254
  17. Kumar R, Mishra BK, Lahiri T, Kumar G, Kumar N, Gupta R, et al. PCV: An Alignment Free Method for Finding Homologous Nucleotide Sequences and its Application in Phylogenetic Study. *Interdiscip Sci*. 2016; doi:10.1007/s12539-015-0136-5
  18. Edgar RC. Search and clustering orders of magnitude faster than BLAST. *Bioinformatics*. 2010;26: 2460–2461. doi:10.1093/bioinformatics/btq461
  19. Smith TF, Waterman MS. Identification of common molecular subsequences. *J Mol Biol*. 1981;147: 195–197. doi:10.1016/0022-2836(81)90087-5
  20. Barbosa-Silva A, Satagopam VP, Schneider R, Ortega JM. Clustering of cognate proteins among distinct proteomes derived from multiple links to a single seed sequence. *BMC Bioinformatics*. 2008;9: 141. doi:10.1186/1471-2105-9-141
  21. Karlin S, Altschul SF. Methods for assessing the statistical significance of molecular sequence features by using general scoring schemes. *Proc Natl Acad Sci U S A*. 1990;87: 2264–8. Available: <http://www.ncbi.nlm.nih.gov/pubmed/2315319>
  22. Souza JA. Reconhecimento de padrões usando indexação recursiva. Thesis. Universidade Federal de Santa Catarina. 1999. Available: <https://repositorio.ufsc.br/handle/123456789/80484>. Accessed 31 May 2016.
  23. The MathWorks Inc. MATLAB and Bioinformatics Toolbox Release 2012b. Natick, Massachusetts, United States; Available: <http://www.mathworks.com>. Accessed 31 May 2016.
  24. Finn RD, Tate J, Mistry J, Coggill PC, Sammut SJ, Hotz H-R, et al. The Pfam protein families database. *Nucleic Acids Res*. 2007;36: D281–D288. doi:10.1093/nar/gkm960
  25. Suzek BE, Huang H, McGarvey P, Mazumder R, Wu CH. UniRef: comprehensive and non-redundant UniProt reference clusters. *Bioinformatics*. 2007;23: 1282–1288.  
doi:10.1093/bioinformatics/btm098
  26. Tatusov RL, Koonin E V, Lipman DJ. A genomic perspective on protein families. *Science*. 1997;278: 631–7.



## FIGURES

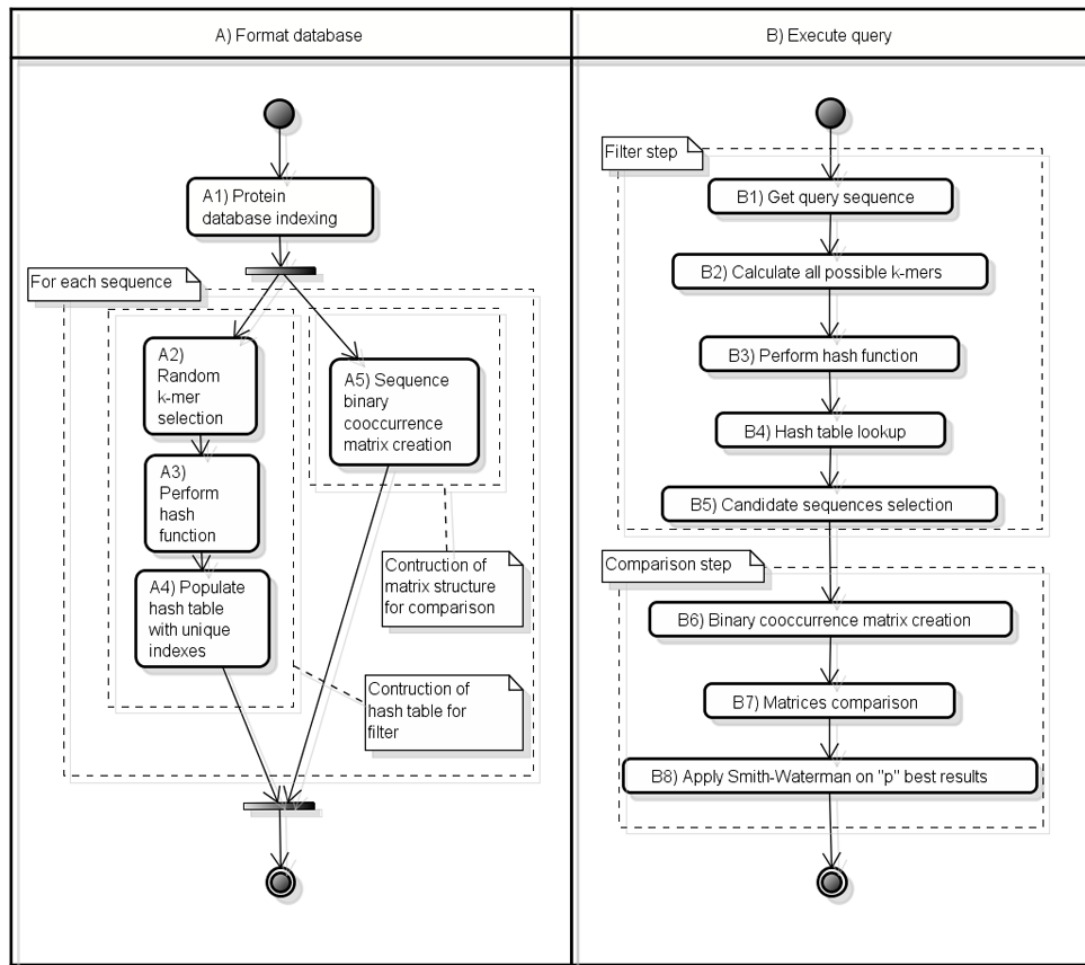

**Figure 1. RAFTS3 activity diagram.** RAFTS3 format database and query search overview. A) Shows the database formatting processes, which involve construction of two structures used in query sequence search, a hash table and a set of binary co-occurrence matrices. B) Shows the process for searching and comparison of a query sequence, with filtering and comparison steps separated.

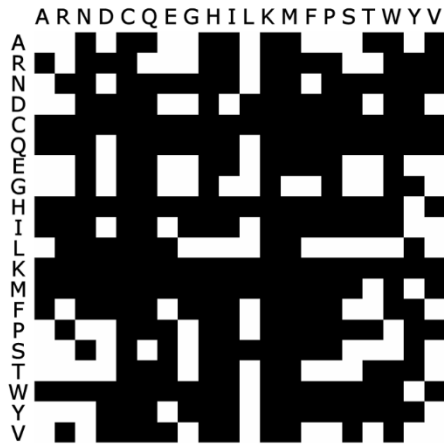

**Figure 2. Binary co-occurrence matrix (BCOM).** Co-occurrence matrix of a protein sequence. White squares represent the occurrence of amino acid pairs; black squares represent non-occurrence.

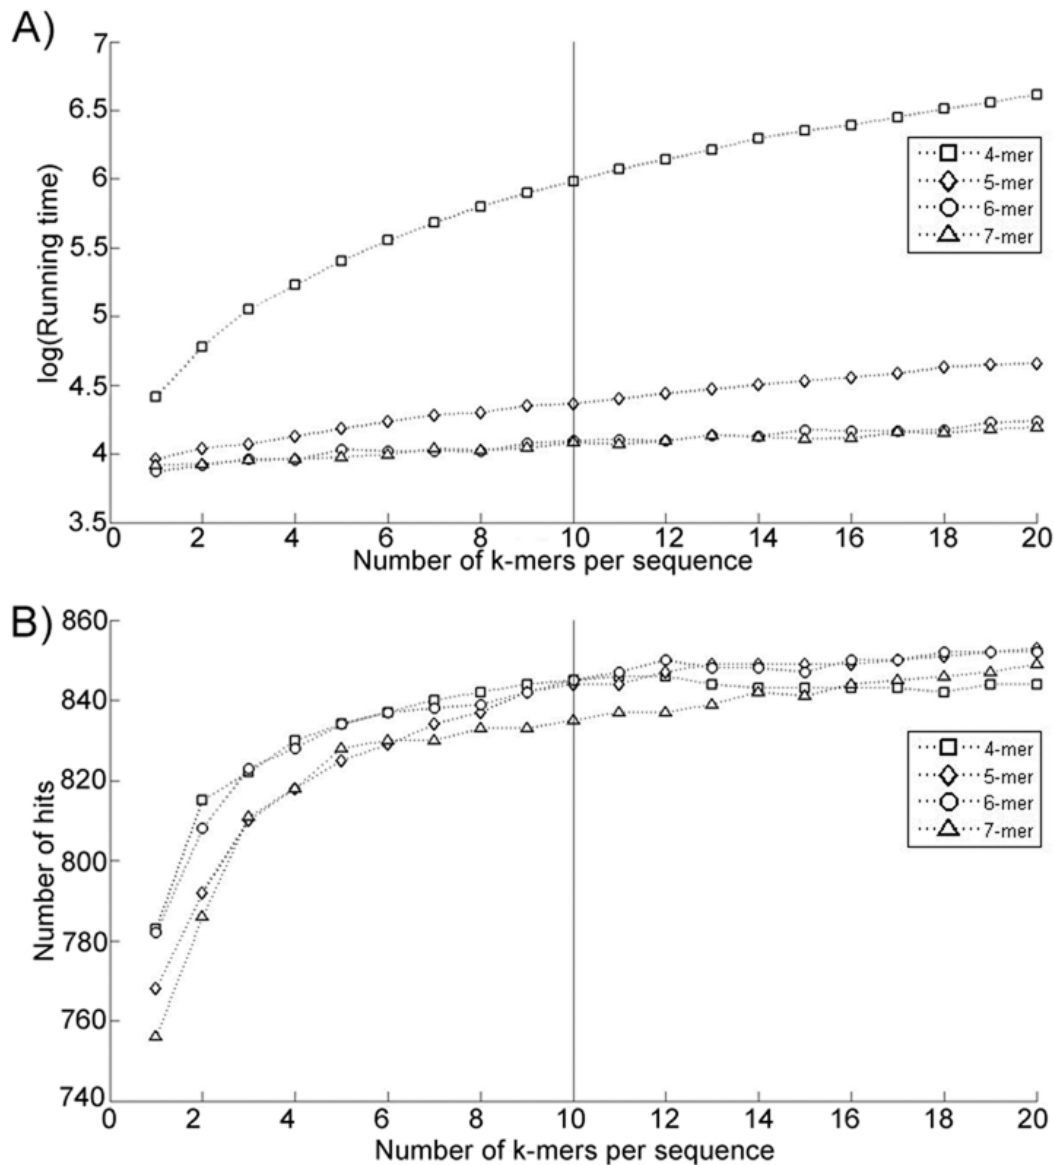

**Figure 3. Parameters selection and configuration testing.** Comparison of different k-mer sets. The comparison was made by analyzing the second best hit of the search results of 1000 sequences randomly selected. The number of k-mers ranged from 1 to 20 and their lengths were 4, 5, 6 and 7 amino acid residues. A) Shows the logarithm of the running time in seconds to search 1000 queries for each configuration. B) Shows the number of queries with second best hit with relative score over 0.3.

## TABLES

**Table 1.** Amino acid numeric conversion

| Amino acid | Code  |
|------------|-------|
| A          | 3 2 4 |
| R          | 1 3 1 |
| N          | 1 1 2 |
| D          | 3 1 2 |
| C          | 4 3 2 |
| Q          | 2 1 1 |
| E          | 3 1 1 |
| G          | 3 3 4 |
| H          | 2 1 4 |
| I          | 1 4 1 |
| L          | 2 4 2 |
| K          | 1 1 1 |
| M          | 1 4 3 |
| F          | 4 4 2 |
| P          | 2 2 4 |
| S          | 4 2 1 |
| T          | 1 2 4 |
| W          | 4 3 3 |
| Y          | 4 1 2 |
| V          | 3 4 2 |

Two-way conversion table of amino acid residues to quaternary numeral system triplets.

**Table 2.** Performance comparison of similarity search tools on the same query dataset (1000 sequences) against different protein databases

| Database | Total sequences | Total aa      | Running time |           | Percentage of sequences over relative score threshold found by RAFTS3 compared with BLASTp |     |     |     |     |     |     |
|----------|-----------------|---------------|--------------|-----------|--------------------------------------------------------------------------------------------|-----|-----|-----|-----|-----|-----|
|          |                 |               | BLASTp       | RAFTS3    | 0.3                                                                                        | 0.4 | 0.5 | 0.6 | 0.7 | 0.8 | 0.9 |
| UniRef50 | 6,784,251       | 2,189,361,886 | 120m16.516s  | 0m47.209s | 81%                                                                                        | 80% | 77% | 80% | 87% | 92% | 95% |
| Pfam     | 15,929,002      | 5,169,768,107 | 262m22.350s  | 0m52.832s | 86%                                                                                        | 91% | 92% | 93% | 95% | 95% | 94% |
| NR       | 19,689,576      | 6,752,058,980 | 362m1.048s   | 1m7.514s  | 89%                                                                                        | 92% | 93% | 95% | 96% | 97% | 96% |

The total number of sequences and amino acids included in each database are shown in the "Total sequences" and "Total aa" columns, respectively. The ratio RAFTS3/BLASTp gives the fraction of RAFTS3 hits over BLASTp hits for the indicated relative score thresholds.

**Table 3.** Comparison of top 10 of BLASTp and RAFTS3 hits of *Bacillus subtilis* PyrR protein

| RAFTS3                                                                           |            |                                                                                                                                                                                         | BLASTp         |            |                                                                                                                                                                                         |
|----------------------------------------------------------------------------------|------------|-----------------------------------------------------------------------------------------------------------------------------------------------------------------------------------------|----------------|------------|-----------------------------------------------------------------------------------------------------------------------------------------------------------------------------------------|
| Query - UniProtAC: P39765 Bifunctional protein PyrR OS= <i>Bacillus subtilis</i> |            |                                                                                                                                                                                         |                |            |                                                                                                                                                                                         |
| Relative Score                                                                   | E-Value    | Subject Sequence                                                                                                                                                                        | Relative Score | E-value    | Subject Sequence                                                                                                                                                                        |
| 1                                                                                | 1.6941e-50 | gij16078611 ref NP_389430.1  bifunctional pyrimidine regulatory protein PyrR/uracil phosphoribosyltransferase [ <i>Bacillus subtilis</i> subsp. <i>subtilis</i> str. 168]               | 1              | 1.6941e-50 | gij16078611 ref NP_389430.1  bifunctional pyrimidine regulatory protein PyrR/uracil phosphoribosyltransferase [ <i>Bacillus subtilis</i> subsp. <i>subtilis</i> str. 168]               |
| 0.991274                                                                         | 4.9554e-50 | gij296331123 ref ZP_06873597.1  bifunctional pyrimidine regulatory protein PyrR uracil phosphoribosyltransferase [ <i>Bacillus subtilis</i> subsp. <i>spizizenii</i> ATCC 6633]         | 0.991274       | 4.9554e-50 | gij296331123 ref ZP_06873597.1  bifunctional pyrimidine regulatory protein PyrR uracil phosphoribosyltransferase [ <i>Bacillus subtilis</i> subsp. <i>spizizenii</i> ATCC 6633]         |
| 0.958988                                                                         | 2.5129e-48 | gij1373160 gb AAB57770.1  PyrR, partial [ <i>Bacillus subtilis</i> subsp. <i>subtilis</i> str. 168]                                                                                     | 0.973822       | 4.24e-49   | gij398304125 ref ZP_10507711.1  bifunctional pyrimidine regulatory protein PyrR uracil phosphoribosyltransferase [ <i>Bacillus vallismortis</i> DV1-F-3]                                |
| 0.973822                                                                         | 4.24e-49   | gij398304125 ref ZP_10507711.1  bifunctional pyrimidine regulatory protein PyrR uracil phosphoribosyltransferase [ <i>Bacillus vallismortis</i> DV1-F-3]                                | 0.954625       | 4.4966e-48 | gij154685963 ref YP_001421124.1  bifunctional pyrimidine regulatory protein PyrR uracil phosphoribosyltransferase [ <i>Bacillus amyloliquefaciens</i> FZB42]                            |
| 0.954625                                                                         | 4.4966e-48 | gij154685963 ref YP_001421124.1  bifunctional pyrimidine regulatory protein PyrR uracil phosphoribosyltransferase [ <i>Bacillus amyloliquefaciens</i> FZB42]                            | 0.951134       | 6.9078e-48 | gij311068068 ref YP_003972991.1  bifunctional pyrimidine regulatory protein PyrR/uracil phosphoribosyltransferase [ <i>Bacillus atrophaeus</i> 1942]                                    |
| 0.953752                                                                         | 5.006e-48  | gij375362191 ref YP_005130230.1  bifunctional pyrimidine regulatory protein PyrR/uracil phosphoribosyltransferase [ <i>Bacillus amyloliquefaciens</i> subsp. <i>plantarum</i> CAU B946] | 0.958988       | 2.5129e-48 | gij1373160 gb AAB57770.1  PyrR, partial [ <i>Bacillus subtilis</i> subsp. <i>subtilis</i> str. 168]                                                                                     |
| 0.951134                                                                         | 6.9078e-48 | gij311068068 ref YP_003972991.1  bifunctional pyrimidine regulatory protein PyrR/uracil phosphoribosyltransferase [ <i>Bacillus atrophaeus</i> 1942]                                    | 0.953752       | 5.006e-48  | gij375362191 ref YP_005130230.1  bifunctional pyrimidine regulatory protein PyrR/uracil phosphoribosyltransferase [ <i>Bacillus amyloliquefaciens</i> subsp. <i>plantarum</i> CAU B946] |
| 0.904887                                                                         | 2.0525e-45 | gij52080149 ref YP_078940.1  bifunctional pyrimidine regulatory protein PyrR uracil phosphoribosyltransferase [ <i>Bacillus licheniformis</i> DSM 13 = ATCC 14580]                      | 0.904887       | 2.0525e-45 | gij52080149 ref YP_078940.1  bifunctional pyrimidine regulatory protein PyrR uracil phosphoribosyltransferase [ <i>Bacillus licheniformis</i> DSM 13 = ATCC 14580]                      |
| 0.877836                                                                         | 5.6563e-44 | gij389573331 ref ZP_10163406.1  bifunctional protein PyrR [ <i>Bacillus aerophilus</i> KACC 16563]                                                                                      | 0.877836       | 5.6563e-44 | gij389573331 ref ZP_10163406.1  bifunctional protein PyrR [ <i>Bacillus aerophilus</i> KACC 16563]                                                                                      |
| 0.873473                                                                         | 9.6739e-44 | gij157692227 ref YP_001486689.1  pyrR gene product [ <i>Bacillus pumilus</i> SAFR-032]                                                                                                  | 0.872600       | 1.077e-43  | gij194014677 ref ZP_03053294.1  bifunctional protein PyrR [ <i>Bacillus pumilus</i> ATCC 7061]                                                                                          |

Comparison of the ten first results of RAFTS3 and BLASTp searching the *Bacillus subtilis* PyrR protein against the NR database. The subject sequences are ordered by each software default criteria.

**Table 4.** Comparison of top 10 of BLASTp and RAFTS3 hits of *Homo sapiens* Prion protein

| RAFTS3                                                                |            |                                                                                                                                                                          | BLASTp         |            |                                                                                                                                                                       |
|-----------------------------------------------------------------------|------------|--------------------------------------------------------------------------------------------------------------------------------------------------------------------------|----------------|------------|-----------------------------------------------------------------------------------------------------------------------------------------------------------------------|
| Query - UniProtAC: P04156 Major prion protein OS= <i>Homo sapiens</i> |            |                                                                                                                                                                          |                |            |                                                                                                                                                                       |
| Relative Score                                                        | E-Value    | Subject Sequence                                                                                                                                                         | Relative Score | E-value    | Subject Sequence                                                                                                                                                      |
| 1                                                                     | 3.2879e-83 | gi 4506113 ref NP_000302.1  major prion protein preproprotein [ <i>Homo sapiens</i> ]                                                                                    | 1              | 3.2879e-83 | gi 4506113 ref NP_000302.1  major prion protein preproprotein [ <i>Homo sapiens</i> ]                                                                                 |
| 0.925566                                                              | 8.6244e-77 | gi 747847 emb CAA58442.1  prion protein [ <i>Homo sapiens</i> ]                                                                                                          | 0.997843       | 5.0709e-83 | gi 60834334 gb AAX37089.1  prion protein [synthetic construct]                                                                                                        |
| 0.861920                                                              | 3.1761e-71 | gi 11128458 gb AAC62750.2  prion protein precursor [ <i>Homo sapiens</i> ]                                                                                               | 0.997843       | 5.0709e-83 | gi 54695820 gb AAV38282.1  prion protein (p27-30) (Creutzfeld-Jakob disease, Gerstmann-Strausler-Scheinker syndrome, fatal familial insomnia) [synthetic construct]   |
| 0.925566                                                              | 8.6596e-77 | gi 54695822 gb AAV38283.1  prion protein (p27-30) (Creutzfeld-Jakob disease, Gerstmann-Strausler-Scheinker syndrome, fatal familial insomnia) [synthetic construct]      | 0.994606       | 1.091e-82  | gi 397501420 ref XP_003821383.1  PREDICTED: major prion protein isoform 6 [ <i>Pan paniscus</i> ]                                                                     |
| 0.896440                                                              | 3.2079e-74 | gi 38490002 gb AAR21603.1  prion protein [ <i>Homo sapiens</i> ]                                                                                                         | 0.997843       | 5.0509e-83 | gi 474359 gb AAC50089.1  prion protein [ <i>Gorilla gorilla</i> ]                                                                                                     |
| 0.995146                                                              | 8.6386e-83 | gi 189053893 dbj BAG35206.1  unnamed protein product [ <i>Homo sapiens</i> ]                                                                                             | 0.996764       | 6.2604e-83 | gi 15277486 gb AAH12844.1  Prion protein [ <i>Homo sapiens</i> ]                                                                                                      |
| 0.987594                                                              | 3.8205e-82 | gi 123237246 emb CAM27320.1  prion protein (p27-30) (Creutzfeldt-Jakob disease, Gerstmann-Strausler-Scheinker syndrome, fatal familial insomnia) [ <i>Homo sapiens</i> ] | 0.996764       | 6.2604e-83 | gi 89160954 gb ABD63004.1  prion protein PrP [ <i>Homo sapiens</i> ]                                                                                                  |
| 0.997843                                                              | 5.0709e-83 | gi 54695820 gb AAV38282.1  prion protein (p27-30) (Creutzfeld-Jakob disease, Gerstmann-Strausler-Scheinker syndrome, fatal familial insomnia) [synthetic construct]      | 0.994606       | 9.6174e-83 | gi 57114055 ref NP_001009093.1  major prion protein preproprotein [ <i>Pan troglodytes</i> ]                                                                          |
| 0.996764                                                              | 6.2604e-83 | gi 15277486 gb AAH12844.1  Prion protein [ <i>Homo sapiens</i> ]                                                                                                         | 0.994067       | 1.0707e-82 | gi 18490397 gb AAH22532.1  Prion protein [ <i>Homo sapiens</i> ]                                                                                                      |
| 0.773463                                                              | 1.1262e-63 | gi 194381546 dbj BAG58727.1  unnamed protein product [ <i>Homo sapiens</i> ]                                                                                             | 0.992449       | 1.4775e-82 | gi 54695862 gb AAV38303.1  prion protein (p27-30) (Creutzfeld-Jakob disease, Gerstmann-Strausler-Scheinker syndrome, fatal familial insomnia) [ <i>Homo sapiens</i> ] |

Comparison of the ten first results of RAFTS3 and BLASTp searching the *Homo sapiens* Prion protein against the NR database. The subject sequences are ordered by each software default criteria.

**Table 5.** Comparison of top 10 of BLASTp and RAFTS3 hits of *Homo sapiens* PSG1 protein

| RAFTS3                                                                                     |             |                                                                                                                        | BLASTp         |             |                                                                                                                         |
|--------------------------------------------------------------------------------------------|-------------|------------------------------------------------------------------------------------------------------------------------|----------------|-------------|-------------------------------------------------------------------------------------------------------------------------|
| Query - UniProtAC: P11464 Pregnancy-specific beta-1-glycoprotein 1 OS= <i>Homo sapiens</i> |             |                                                                                                                        |                |             |                                                                                                                         |
| Relative Score                                                                             | E-Value     | Subject Sequence                                                                                                       | Relative Score | E-value     | Subject Sequence                                                                                                        |
| 1                                                                                          | 3.9757e-128 | gij 296317345 ref NP_001171754.1  pregnancy-specific beta-1-glycoprotein 1 isoform 2 precursor [ <i>Homo sapiens</i> ] | 1              | 3.9757e-128 | gij 296317345 ref NP_001171754.1  pregnancy-specific beta-1-glycoprotein 1 isoform 2 precursor [ <i>Homo sapiens</i> ]  |
| 0.996463                                                                                   | 1.1629e-127 | gij 190645 gb AAA36515.1  pregnancy-specific glycoprotein-1a [ <i>Homo sapiens</i> ]                                   | 0.996463       | 1.1629e-127 | gij 190645 gb AAA36515.1  pregnancy-specific glycoprotein-1a [ <i>Homo sapiens</i> ]                                    |
| 0.985497                                                                                   | 3.31e-126   | gij 306797 gb AAA52602.1  pregnancy-specific beta-glycoprotein c [ <i>Homo sapiens</i> ]                               | 0.985497       | 3.2249e-126 | gij 296317348 ref NP_001171755.1  pregnancy-specific beta-1-glycoprotein 1 isoform 3 precursor [ <i>Homo sapiens</i> ]  |
| 0.985497                                                                                   | 3.2249e-126 | gij 296317348 ref NP_001171755.1  pregnancy-specific beta-1-glycoprotein 1 isoform 3 precursor [ <i>Homo sapiens</i> ] | 0.985497       | 3.31e-126   | gij 306797 gb AAA52602.1  pregnancy-specific beta-glycoprotein c [ <i>Homo sapiens</i> ]                                |
| 0.981606                                                                                   | 1.0502e-125 | gij 306791 gb AAA52590.1  pregnancy-specific beta-1-glycoprotein [ <i>Homo sapiens</i> ]                               | 0.989034       | 1.1263e-126 | gij 21361392 ref NP_008836.2  pregnancy-specific beta-1-glycoprotein 1 isoform 1 precursor [ <i>Homo sapiens</i> ]      |
| 0.989034                                                                                   | 1.1263e-126 | gij 21361392 ref NP_008836.2  pregnancy-specific beta-1-glycoprotein 1 isoform 1 precursor [ <i>Homo sapiens</i> ]     | 0.981606       | 1.0502e-125 | gij 306791 gb AAA52590.1  pregnancy-specific beta-1-glycoprotein [ <i>Homo sapiens</i> ]                                |
| 0.985497                                                                                   | 3.2945e-126 | gij 190653 gb AAA36517.1  pregnancy-specific glycoprotein-1d [ <i>Homo sapiens</i> ]                                   | 0.985497       | 3.2945e-126 | gij 190653 gb AAA36517.1  pregnancy-specific glycoprotein-1d [ <i>Homo sapiens</i> ]                                    |
| 0.985143                                                                                   | 3.6678e-126 | gij 190591 gb AAA36511.1  pregnancy-specific beta-1-glycoprotein [ <i>Homo sapiens</i> ]                               | 0.985143       | 3.6678e-126 | gij 190591 gb AAA36511.1  pregnancy-specific beta-1-glycoprotein [ <i>Homo sapiens</i> ]                                |
| 0.569155                                                                                   | 1.8476e-71  | gij 3287447 gb AAC25485.1  PSGIIA-a [ <i>Homo sapiens</i> ]                                                            | 0.948709       | 2.2829e-121 | gij 14250018 gb AAH08405.1  PSG4 protein [ <i>Homo sapiens</i> ]                                                        |
| 0.948709                                                                                   | 2.2829e-121 | gij 14250018 gb AAH08405.1  PSG4 protein [ <i>Homo sapiens</i> ]                                                       | 0.949416       | 1.8419e-121 | gij 332855947 ref XP_512709.3  PREDICTED: pregnancy-specific beta-1-glycoprotein 1 isoform 3 [ <i>Pan troglodytes</i> ] |

Comparison of the ten first results of RAFTS3 and BLASTp searching the *Homo sapiens* PSG1 protein against the NR database. The subject sequences are ordered by each software default criteria.



**Table 6.** Performance comparison of RAFTS3 and PAUDA

| Software | Runtime | Number of hits per relative score threshold |     |     |     |     |     |     |
|----------|---------|---------------------------------------------|-----|-----|-----|-----|-----|-----|
|          |         | 0.3                                         | 0.4 | 0.5 | 0.6 | 0.7 | 0.8 | 0.9 |
| RAFTS3   | 428s    | 665                                         | 512 | 435 | 358 | 282 | 211 | 125 |
| PAUDA    | 458s    | 313                                         | 201 | 131 | 89  | 60  | 46  | 36  |

The number of hits represent the number of sequences retrieved with relative score higher than the relative score threshold.

## SUPPORTING INFORMATION

**Table S1.** Comparison of BLASTp and RAFTS3 hits ranking.

| Rank position | BLASTp best hits                 |                             | RAFTS3 best hits                 |                             |
|---------------|----------------------------------|-----------------------------|----------------------------------|-----------------------------|
|               | Number of best hits <sup>A</sup> | Mean of scores <sup>B</sup> | Number of best hits <sup>C</sup> | Mean of scores <sup>B</sup> |
| 1             | 429                              | 0.89                        | 429                              | 0.89                        |
| 2             | 105                              | 0.91                        | 118                              | 0.86                        |
| 3             | 44                               | 0.83                        | 65                               | 0.84                        |
| 4             | 34                               | 0.90                        | 35                               | 0.83                        |
| 5             | 25                               | 0.86                        | 25                               | 0.81                        |
| 6             | 14                               | 0.83                        | 16                               | 0.74                        |
| 7             | 10                               | 0.89                        | 9                                | 0.84                        |
| 8             | 9                                | 0.88                        | 13                               | 0.78                        |
| 9             | 8                                | 0.87                        | 10                               | 0.81                        |
| 10            | 8                                | 0.86                        | 7                                | 0.66                        |
| 11            | 3                                | 0.77                        | 2                                | 0.72                        |
| 12            | 2                                | 0.95                        | 5                                | 0.57                        |
| 13            | 3                                | 0.74                        | 6                                | 0.71                        |
| 14            | 8                                | 0.75                        | 8                                | 0.87                        |
| 15            | 1                                | 0.77                        | 6                                | 0.70                        |
| 16            | 5                                | 0.89                        | 3                                | 0.47                        |
| 17            | 2                                | 0.91                        | 2                                | 0.63                        |
| 18            | 1                                | 0.94                        | 2                                | 0.63                        |
| 19            | 3                                | 0.60                        | 3                                | 0.69                        |
| 20            | 1                                | 1.00                        | 1                                | 0.59                        |
| 21            | 1                                | 0.81                        | 2                                | 0.42                        |
| 22            | 1                                | 0.99                        | 2                                | 0.68                        |
| 23            | 2                                | 0.79                        | 0                                | 0.00                        |
| 24            | 0                                | 0.00                        | 2                                | 0.87                        |
| 25            | 1                                | 1.00                        | 3                                | 0.91                        |
| 26            | 0                                | 0.00                        | 1                                | 0.97                        |
| 27            | 1                                | 0.98                        | 2                                | 0.36                        |
| 28            | 2                                | 0.73                        | 1                                | 0.99                        |
| 29            | 0                                | 0.00                        | 1                                | 0.99                        |
| 30            | 0                                | 0.00                        | 2                                | 0.74                        |
| 31            | 0                                | 0.00                        | 3                                | 0.46                        |
| 32            | 1                                | 0.80                        | 1                                | 0.96                        |
| 33            | 0                                | 0.00                        | 2                                | 0.75                        |
| 34            | 0                                | 0.00                        | 1                                | 0.57                        |
| 35            | 0                                | 0.00                        | 1                                | 0.96                        |
| 36            | 3                                | 0.97                        | 0                                | 0.00                        |
| 37            | 0                                | 0.00                        | 2                                | 0.96                        |
| 38            | 0                                | 0.00                        | 0                                | 0.00                        |
| 39            | 1                                | 0.95                        | 0                                | 0.00                        |
| 40            | 1                                | 0.98                        | 0                                | 0.00                        |
| 41            | 0                                | 0.00                        | 0                                | 0.00                        |
| 42            | 0                                | 0.00                        | 2                                | 0.78                        |
| 43            | 0                                | 0.00                        | 0                                | 0.00                        |
| 44            | 0                                | 0.00                        | 4                                | 0.68                        |
| 45            | 0                                | 0.00                        | 0                                | 0.00                        |
| 46            | 0                                | 0.00                        | 1                                | 0.53                        |
| 47            | 0                                | 0.00                        | 1                                | 0.92                        |
| 48            | 0                                | 0.00                        | 0                                | 0.00                        |
| 49            | 0                                | 0.00                        | 1                                | 0.53                        |
| 50            | 0                                | 0.00                        | 0                                | 0.00                        |

The number of best hits of each tool is located in the top 50 hits of the other. 1000 sequences of the data set were used as queries for searching NR database with BLASTp or RAFTS3, and the number of best hit of each tool was scored for each rank position of the other tool. For example, 429 best hits of BLASTp are also best hits of RAFTS3, while 105 best hits of RAFTS3 are second best hits of BLASTp.

<sup>A</sup> Number of RAFTS3 best hits occurring in the indicated BLASTp rank position.

<sup>B</sup> Average relative score of the best hits occurring in the indicated rank position.

<sup>C</sup> Number of BLASTp best hits occurring in the indicated RAFTS3 rank position.

**Table S2.** Comparison of top 50 results of BLASTp and RAFTS3 for 5 random proteins.

| Query                                       | Rank | BLASTp |          |           | RAFTS3 |          |           |
|---------------------------------------------|------|--------|----------|-----------|--------|----------|-----------|
|                                             |      | Score  | E-value  | GI        | Score  | E-value  | GI        |
| hypothetical protein [Nocardiopsis prasina] | 1    | 0.72   | 4.63E-36 | 54026316  | 0.68   | 1.41E-33 | 108799494 |
| hypothetical protein [Nocardiopsis prasina] | 2    | 0.71   | 1.49E-35 | 300786153 | 0.68   | 7.40E-34 | 126435148 |
| hypothetical protein [Nocardiopsis prasina] | 3    | 0.68   | 7.40E-34 | 126435148 | 0.72   | 4.63E-36 | 54026316  |
| hypothetical protein [Nocardiopsis prasina] | 4    | 0.68   | 8.82E-34 | 379709308 | 0.71   | 4.91E-35 | 386772711 |
| hypothetical protein [Nocardiopsis prasina] | 5    | 0.68   | 1.41E-33 | 108799494 | 0.70   | 5.52E-35 | 379736307 |
| hypothetical protein [Nocardiopsis prasina] | 6    | 0.71   | 4.91E-35 | 386772711 | 0.70   | 8.44E-35 | 319949673 |
| hypothetical protein [Nocardiopsis prasina] | 7    | 0.68   | 1.90E-33 | 363419515 | 0.71   | 1.49E-35 | 300786153 |
| hypothetical protein [Nocardiopsis prasina] | 8    | 0.67   | 5.49E-33 | 312139946 | 0.67   | 7.01E-33 | 379748180 |
| hypothetical protein [Nocardiopsis prasina] | 9    | 0.70   | 9.30E-35 | 325964444 | 0.66   | 1.22E-32 | 379755468 |
| hypothetical protein [Nocardiopsis prasina] | 10   | 0.70   | 8.44E-35 | 319949673 | 0.70   | 9.30E-35 | 325964444 |
| hypothetical protein [Nocardiopsis prasina] | 11   | 0.66   | 1.30E-32 | 148271386 | 0.67   | 7.15E-33 | 254821758 |
| hypothetical protein [Nocardiopsis prasina] | 12   | 0.66   | 2.05E-32 | 342858396 | 0.66   | 1.88E-32 | 379763014 |
| hypothetical protein [Nocardiopsis prasina] | 13   | 0.70   | 5.52E-35 | 379736307 | 0.68   | 1.90E-33 | 363419515 |
| hypothetical protein [Nocardiopsis prasina] | 14   | 0.69   | 1.74E-34 | 302526736 | 0.68   | 8.82E-34 | 379709308 |
| hypothetical protein [Nocardiopsis prasina] | 15   | 0.65   | 5.16E-32 | 239985975 | 0.69   | 1.74E-34 | 302526736 |
| hypothetical protein [Nocardiopsis prasina] | 16   | 0.67   | 4.19E-33 | 378816503 | 0.67   | 4.19E-33 | 378816503 |
| hypothetical protein [Nocardiopsis prasina] | 17   | 0.66   | 1.22E-32 | 379755468 | 0.67   | 3.58E-33 | 397679577 |
| hypothetical protein [Nocardiopsis prasina] | 18   | 0.64   | 1.93E-31 | 120405695 | 0.67   | 3.54E-33 | 392136326 |
| hypothetical protein [Nocardiopsis prasina] | 19   | 0.66   | 1.88E-32 | 379763014 | 0.66   | 1.30E-32 | 148271386 |
| hypothetical protein [Nocardiopsis prasina] | 20   | 0.68   | 6.58E-34 | 382944866 | 0.61   | 9.04E-30 | 359774163 |
| hypothetical protein [Nocardiopsis prasina] | 21   | 0.68   | 7.32E-34 | 382944705 | 0.60   | 1.33E-29 | 385651505 |
| hypothetical protein [Nocardiopsis prasina] | 22   | 0.68   | 8.77E-34 | 392068192 | 0.68   | 6.58E-34 | 382944866 |
| hypothetical protein [Nocardiopsis prasina] | 23   | 0.68   | 8.64E-34 | 392185753 | 0.68   | 7.32E-34 | 382944705 |
| hypothetical protein [Nocardiopsis prasina] | 24   | 0.63   | 8.40E-31 | 182440470 | 0.67   | 5.49E-33 | 312139946 |
| hypothetical protein [Nocardiopsis prasina] | 25   | 0.67   | 2.96E-33 | 363999376 | 0.69   | 4.24E-34 | 374610654 |
| hypothetical protein [Nocardiopsis prasina] | 26   | 0.67   | 3.54E-33 | 392136326 | 0.64   | 1.60E-31 | 333989082 |
| hypothetical protein [Nocardiopsis prasina] | 27   | 0.67   | 3.58E-33 | 397679577 | 0.43   | 1.22E-20 | 377569218 |
| hypothetical protein [Nocardiopsis prasina] | 28   | 0.63   | 6.21E-31 | 311741875 | 0.63   | 6.21E-31 | 311741875 |
| hypothetical protein [Nocardiopsis prasina] | 29   | 0.67   | 7.01E-33 | 379748180 | 0.68   | 8.77E-34 | 392068192 |
| hypothetical protein [Nocardiopsis prasina] | 30   | 0.67   | 7.15E-33 | 254821758 | 0.67   | 5.23E-33 | 325674171 |
| hypothetical protein [Nocardiopsis prasina] | 31   | 0.67   | 5.23E-33 | 325674171 | 0.54   | 2.58E-26 | 392847751 |
| hypothetical protein [Nocardiopsis prasina] | 32   | 0.65   | 4.77E-32 | 296164157 | 0.62   | 1.33E-30 | 118472651 |

|                                             |    |      |          |           |      |          |           |
|---------------------------------------------|----|------|----------|-----------|------|----------|-----------|
| hypothetical protein [Nocardiopsis prasina] | 33 | 0.61 | 9.04E-30 | 359774163 | 0.55 | 1.78E-26 | 365870395 |
| hypothetical protein [Nocardiopsis prasina] | 34 | 0.59 | 4.46E-29 | 333022807 | 0.55 | 1.72E-26 | 392086623 |
| hypothetical protein [Nocardiopsis prasina] | 35 | 0.59 | 1.10E-28 | 328880653 | 0.55 | 7.93E-27 | 358003015 |
| hypothetical protein [Nocardiopsis prasina] | 36 | 0.53 | 7.08E-26 | 331696237 | 0.55 | 1.77E-26 | 386691466 |
| hypothetical protein [Nocardiopsis prasina] | 37 | 0.65 | 5.36E-32 | 145222559 | 0.53 | 1.41E-25 | 163857205 |
| hypothetical protein [Nocardiopsis prasina] | 38 | 0.68 | 9.12E-34 | 375137662 | 0.50 | 3.53E-24 | 344998040 |
| hypothetical protein [Nocardiopsis prasina] | 39 | 0.57 | 5.95E-28 | 326330248 | 0.65 | 5.36E-32 | 145222559 |
| hypothetical protein [Nocardiopsis prasina] | 40 | 0.58 | 4.87E-28 | 354570978 | 0.05 | 2.07E+01 | 395776055 |
| hypothetical protein [Nocardiopsis prasina] | 41 | 0.62 | 1.05E-30 | 302523345 | 0.04 | 4.45E+01 | 386354368 |
| hypothetical protein [Nocardiopsis prasina] | 42 | 0.58 | 3.48E-28 | 392383971 | 0.05 | 1.56E+01 | 375143224 |
| hypothetical protein [Nocardiopsis prasina] | 43 | 0.63 | 2.90E-31 | 262204158 | 0.05 | 1.64E+01 | 83716891  |
| hypothetical protein [Nocardiopsis prasina] | 44 | 0.57 | 6.72E-28 | 337267501 | 0.05 | 2.00E+01 | 257068192 |
| hypothetical protein [Nocardiopsis prasina] | 45 | 0.57 | 1.28E-27 | 392849102 | 0.05 | 1.66E+01 | 167577907 |
| hypothetical protein [Nocardiopsis prasina] | 46 | 0.56 | 2.16E-27 | 387970235 | 0.05 | 2.42E+01 | 241206048 |
| hypothetical protein [Nocardiopsis prasina] | 47 | 0.56 | 2.19E-27 | 392520598 | 0.06 | 1.34E+01 | 218893839 |
| hypothetical protein [Nocardiopsis prasina] | 48 | 0.56 | 2.71E-27 | 393170990 | 0.06 | 6.61E+00 | 373478940 |
| hypothetical protein [Nocardiopsis prasina] | 49 | 0.56 | 2.40E-27 | 397688108 | 0.05 | 2.89E+01 | 359149253 |
| hypothetical protein [Nocardiopsis prasina] | 50 | 0.55 | 7.93E-27 | 358003015 | 0.05 | 4.14E+01 | 168009884 |
| transposase [Bacillus cereus]               | 1  | 0.93 | 1.25E-79 | 206973981 | 0.91 | 1.97E-78 | 218896864 |
| transposase [Bacillus cereus]               | 2  | 0.92 | 4.07E-79 | 75763559  | 0.86 | 8.35E-74 | 229085868 |
| transposase [Bacillus cereus]               | 3  | 0.91 | 1.97E-78 | 218896864 | 0.92 | 1.48E-78 | 229090883 |
| transposase [Bacillus cereus]               | 4  | 0.92 | 9.60E-79 | 391290908 | 0.93 | 1.25E-79 | 206973981 |
| transposase [Bacillus cereus]               | 5  | 0.92 | 1.07E-78 | 206973765 | 0.91 | 3.88E-78 | 196038692 |
| transposase [Bacillus cereus]               | 6  | 0.92 | 1.48E-78 | 229090883 | 0.91 | 4.81E-78 | 196038713 |
| transposase [Bacillus cereus]               | 7  | 0.91 | 3.88E-78 | 196038692 | 0.92 | 4.07E-79 | 75763559  |
| transposase [Bacillus cereus]               | 8  | 0.91 | 4.81E-78 | 196038713 | 0.92 | 1.07E-78 | 206973765 |
| transposase [Bacillus cereus]               | 9  | 0.90 | 4.52E-77 | 196042445 | 0.90 | 4.52E-77 | 196042445 |
| transposase [Bacillus cereus]               | 10 | 0.90 | 5.13E-77 | 75760431  | 0.83 | 2.22E-71 | 222094044 |
| transposase [Bacillus cereus]               | 11 | 0.88 | 1.76E-75 | 206973407 | 0.88 | 1.76E-75 | 206973407 |
| transposase [Bacillus cereus]               | 12 | 0.86 | 8.35E-74 | 229085868 | 0.92 | 9.60E-79 | 391290908 |
| transposase [Bacillus cereus]               | 13 | 0.84 | 7.58E-72 | 228905309 | 0.84 | 7.58E-72 | 228905309 |
| transposase [Bacillus cereus]               | 14 | 0.83 | 2.22E-71 | 222094044 | 0.82 | 4.48E-70 | 229073617 |
| transposase [Bacillus cereus]               | 15 | 0.83 | 8.95E-71 | 229172505 | 0.82 | 2.91E-70 | 229095554 |
| transposase [Bacillus cereus]               | 16 | 0.82 | 2.91E-70 | 229095554 | 0.83 | 8.95E-71 | 229172505 |
| transposase [Bacillus cereus]               | 17 | 0.82 | 4.48E-70 | 229073617 | 0.90 | 5.13E-77 | 75760431  |
| transposase [Bacillus cereus]               | 18 | 0.80 | 3.28E-68 | 229182210 | 0.80 | 3.28E-68 | 229182210 |
| transposase [Bacillus cereus]               | 19 | 0.66 | 1.14E-55 | 225871669 | 0.55 | 2.44E-46 | 75762371  |
| transposase [Bacillus cereus]               | 20 | 0.65 | 3.71E-55 | 227811612 | 0.52 | 8.47E-44 | 228911455 |
| transposase [Bacillus cereus]               | 21 | 0.65 | 8.75E-55 | 254762474 | 0.65 | 3.71E-55 | 227811612 |
| transposase [Bacillus cereus]               | 22 | 0.57 | 5.32E-48 | 301068226 | 0.66 | 1.14E-55 | 225871669 |
| transposase [Bacillus cereus]               | 23 | 0.55 | 2.44E-46 | 75762371  | 0.65 | 8.75E-55 | 254762474 |
| transposase [Bacillus cereus]               | 24 | 0.56 | 1.46E-46 | 228970158 | 0.47 | 2.87E-39 | 75764333  |
| transposase [Bacillus cereus]               | 25 | 0.52 | 8.47E-44 | 228911455 | 0.57 | 5.32E-48 | 301068226 |

|                               |    |      |          |           |      |          |           |
|-------------------------------|----|------|----------|-----------|------|----------|-----------|
| transposase [Bacillus cereus] | 26 | 0.55 | 1.56E-45 | 229106961 | 0.46 | 2.25E-38 | 75759724  |
| transposase [Bacillus cereus] | 27 | 0.54 | 2.41E-45 | 229119272 | 0.44 | 1.68E-36 | 75763688  |
| transposase [Bacillus cereus] | 28 | 0.54 | 4.12E-45 | 206973911 | 0.56 | 1.46E-46 | 228970158 |
| transposase [Bacillus cereus] | 29 | 0.54 | 4.09E-45 | 221642251 | 0.47 | 2.33E-38 | 10956343  |
| transposase [Bacillus cereus] | 30 | 0.50 | 5.62E-41 | 228924890 | 0.47 | 5.40E-39 | 301068223 |
| transposase [Bacillus cereus] | 31 | 0.48 | 2.69E-40 | 228906894 | 0.47 | 9.24E-39 | 165873444 |
| transposase [Bacillus cereus] | 32 | 0.47 | 2.87E-39 | 75764333  | 0.47 | 1.27E-38 | 254739166 |
| transposase [Bacillus cereus] | 33 | 0.46 | 2.25E-38 | 75759724  | 0.04 | 1.10E+01 | 371777874 |
| transposase [Bacillus cereus] | 34 | 0.44 | 1.68E-36 | 75763688  | 0.04 | 1.42E+01 | 163786962 |
| transposase [Bacillus cereus] | 35 | 0.47 | 1.10E-38 | 47568876  | 0.03 | 3.00E+01 | 229580250 |
| transposase [Bacillus cereus] | 36 | 0.47 | 5.40E-39 | 301068223 | 0.03 | 2.98E+01 | 399003489 |
| transposase [Bacillus cereus] | 37 | 0.47 | 2.33E-38 | 10956343  | 0.03 | 7.00E+01 | 336315012 |
| transposase [Bacillus cereus] | 38 | 0.47 | 9.24E-39 | 165873444 | 0.03 | 6.54E+01 | 397602092 |
| transposase [Bacillus cereus] | 39 | 0.47 | 1.27E-38 | 254739166 | 0.03 | 1.15E+02 | 328859802 |
| transposase [Bacillus cereus] | 40 | 0.42 | 2.03E-34 | 10956376  | 0.04 | 1.13E+01 | 355670767 |
| transposase [Bacillus cereus] | 41 | 0.45 | 1.15E-36 | 23099091  | 0.03 | 4.22E+01 | 255954341 |
| transposase [Bacillus cereus] | 42 | 0.40 | 3.14E-33 | 254687682 | 0.04 | 1.66E+01 | 390944355 |
| transposase [Bacillus cereus] | 43 | 0.44 | 3.77E-36 | 383438775 | 0.03 | 3.86E+01 | 375163697 |
| transposase [Bacillus cereus] | 44 | 0.44 | 1.49E-35 | 386712685 | 0.03 | 4.04E+01 | 284035464 |
| transposase [Bacillus cereus] | 45 | 0.44 | 3.77E-36 | 52078969  | 0.03 | 7.45E+01 | 325912143 |
| transposase [Bacillus cereus] | 46 | 0.44 | 5.20E-36 | 383439073 | 0.03 | 4.78E+01 | 218192290 |
| transposase [Bacillus cereus] | 47 | 0.41 | 1.86E-33 | 261409030 | 0.03 | 1.32E+02 | 301776841 |
| transposase [Bacillus cereus] | 48 | 0.41 | 2.26E-33 | 315647012 | 0.04 | 1.79E+01 | 340380971 |
| transposase [Bacillus cereus] | 49 | 0.40 | 1.74E-32 | 261409860 | 0.03 | 1.06E+02 | 296278265 |
| transposase [Bacillus cereus] | 50 | 0.41 | 2.86E-33 | 372455285 | 0.03 | 5.29E+01 | 12697963  |
| iroE [Klebsiella pneumoniae]  | 1  | 1.00 | 1.58E-82 | 262044290 | 1.00 | 1.58E-82 | 262044290 |
| iroE [Klebsiella pneumoniae]  | 2  | 0.99 | 3.00E-82 | 397743876 | 0.99 | 1.35E-81 | 238894719 |
| iroE [Klebsiella pneumoniae]  | 3  | 0.99 | 5.13E-82 | 386034811 | 0.99 | 3.00E-82 | 397743876 |
| iroE [Klebsiella pneumoniae]  | 4  | 0.99 | 5.71E-82 | 397345874 | 0.99 | 5.13E-82 | 386034811 |
| iroE [Klebsiella pneumoniae]  | 5  | 0.99 | 5.10E-82 | 152970230 | 0.99 | 5.10E-82 | 152970230 |
| iroE [Klebsiella pneumoniae]  | 6  | 0.99 | 5.67E-82 | 397446209 | 0.99 | 8.72E-82 | 365141280 |
| iroE [Klebsiella pneumoniae]  | 7  | 0.99 | 1.35E-81 | 238894719 | 0.99 | 5.71E-82 | 397345874 |
| iroE [Klebsiella pneumoniae]  | 8  | 0.99 | 8.72E-82 | 365141280 | 0.99 | 5.67E-82 | 397446209 |
| iroE [Klebsiella pneumoniae]  | 9  | 0.87 | 1.02E-71 | 288935507 | 0.87 | 1.13E-71 | 290509545 |
| iroE [Klebsiella pneumoniae]  | 10 | 0.87 | 1.13E-71 | 290509545 | 0.86 | 4.11E-71 | 206579000 |
| iroE [Klebsiella pneumoniae]  | 11 | 0.86 | 4.11E-71 | 206579000 | 0.87 | 1.02E-71 | 288935507 |
| iroE [Klebsiella pneumoniae]  | 12 | 0.52 | 2.77E-41 | 378978774 | 0.49 | 1.37E-38 | 375002495 |
| iroE [Klebsiella pneumoniae]  | 13 | 0.53 | 4.53E-42 | 376400045 | 0.48 | 2.19E-38 | 353606873 |
| iroE [Klebsiella pneumoniae]  | 14 | 0.52 | 4.80E-41 | 375261636 | 0.49 | 5.45E-39 | 366059620 |
| iroE [Klebsiella pneumoniae]  | 15 | 0.52 | 4.80E-41 | 397658746 | 0.48 | 2.97E-38 | 16761559  |
| iroE [Klebsiella pneumoniae]  | 16 | 0.52 | 3.64E-41 | 376395752 | 0.51 | 1.79E-40 | 261341410 |
| iroE [Klebsiella pneumoniae]  | 17 | 0.51 | 1.79E-40 | 261341410 | 0.49 | 1.28E-38 | 204929666 |
| iroE [Klebsiella pneumoniae]  | 18 | 0.51 | 2.40E-40 | 376385392 | 0.49 | 9.29E-39 | 353661331 |
| iroE [Klebsiella pneumoniae]  | 19 | 0.51 | 2.33E-40 | 157145930 | 0.48 | 3.75E-38 | 363551476 |
| iroE [Klebsiella pneumoniae]  | 20 | 0.50 | 9.85E-40 | 295096492 | 0.49 | 1.28E-38 | 238909547 |
| iroE [Klebsiella pneumoniae]  | 21 | 0.50 | 5.09E-40 | 376383330 | 0.50 | 9.85E-40 | 295096492 |
| iroE [Klebsiella pneumoniae]  | 22 | 0.50 | 1.00E-39 | 376383956 | 0.49 | 1.59E-38 | 168238684 |
| iroE [Klebsiella pneumoniae]  | 23 | 0.49 | 3.80E-39 | 397167683 | 0.47 | 2.88E-37 | 353596784 |
| iroE [Klebsiella pneumoniae]  | 24 | 0.47 | 5.58E-37 | 317053692 | 0.49 | 6.05E-39 | 366083251 |
| iroE [Klebsiella pneumoniae]  | 25 | 0.49 | 5.45E-39 | 366059620 | 0.47 | 1.69E-37 | 392819761 |
| iroE [Klebsiella pneumoniae]  | 26 | 0.49 | 6.05E-39 | 322614400 | 0.48 | 2.19E-38 | 168823183 |

|                               |    |      |           |           |      |           |           |
|-------------------------------|----|------|-----------|-----------|------|-----------|-----------|
| iroE [Klebsiella pneumoniae]  | 27 | 0.48 | 5.04E-38  | 365850221 | 0.48 | 5.73E-38  | 205353732 |
| iroE [Klebsiella pneumoniae]  | 28 | 0.49 | 6.05E-39  | 366083251 | 0.03 | 1.83E+01  | 264676321 |
| iroE [Klebsiella pneumoniae]  | 29 | 0.49 | 9.29E-39  | 353661331 | 0.49 | 1.28E-38  | 197249038 |
| iroE [Klebsiella pneumoniae]  | 30 | 0.48 | 3.36E-38  | 336247161 | 0.03 | 6.87E+01  | 237799500 |
| iroE [Klebsiella pneumoniae]  | 31 | 0.49 | 9.29E-39  | 168262124 | 0.50 | 1.00E-39  | 376383956 |
| iroE [Klebsiella pneumoniae]  | 32 | 0.49 | 4.88E-39  | 168233729 | 0.04 | 6.28E+00  | 330817286 |
| iroE [Klebsiella pneumoniae]  | 33 | 0.49 | 1.37E-38  | 375002495 | 0.04 | 3.39E+00  | 294010958 |
| iroE [Klebsiella pneumoniae]  | 34 | 0.49 | 1.28E-38  | 204929666 | 0.50 | 2.35E-39  | 157418222 |
| iroE [Klebsiella pneumoniae]  | 35 | 0.49 | 1.28E-38  | 238909547 | 0.43 | 1.99E-33  | 213424548 |
| iroE [Klebsiella pneumoniae]  | 36 | 0.49 | 1.77E-38  | 353617579 | 0.04 | 8.44E+00  | 383777638 |
| iroE [Klebsiella pneumoniae]  | 37 | 0.49 | 1.28E-38  | 197249038 | 0.49 | 5.56E-39  | 386598810 |
| iroE [Klebsiella pneumoniae]  | 38 | 0.49 | 1.59E-38  | 168238684 | 0.03 | 4.36E+01  | 325271609 |
| iroE [Klebsiella pneumoniae]  | 39 | 0.48 | 2.19E-38  | 168823183 | 0.03 | 2.79E+01  | 386818396 |
| iroE [Klebsiella pneumoniae]  | 40 | 0.48 | 3.03E-38  | 56414734  | 0.03 | 1.85E+02  | 188534867 |
| iroE [Klebsiella pneumoniae]  | 41 | 0.50 | 1.11E-39  | 338767125 | 0.03 | 6.84E+01  | 385653217 |
| iroE [Klebsiella pneumoniae]  | 42 | 0.50 | 1.11E-39  | 222104800 | 0.03 | 2.31E+01  | 167829434 |
| iroE [Klebsiella pneumoniae]  | 43 | 0.48 | 5.76E-38  | 379050444 | 0.03 | 5.08E+02  | 303327182 |
| iroE [Klebsiella pneumoniae]  | 44 | 0.48 | 2.19E-38  | 353606873 | 0.03 | 4.99E+01  | 328770351 |
| iroE [Klebsiella pneumoniae]  | 45 | 0.48 | 2.97E-38  | 16761559  | 0.04 | 1.21E+01  | 87309978  |
| iroE [Klebsiella pneumoniae]  | 46 | 0.48 | 5.73E-38  | 205353732 | 0.05 | 4.74E+00  | 344172297 |
| iroE [Klebsiella pneumoniae]  | 47 | 0.48 | 6.10E-38  | 375124587 | 0.05 | 4.12E+00  | 323358023 |
| iroE [Klebsiella pneumoniae]  | 48 | 0.48 | 3.75E-38  | 363551476 | 0.04 | 3.02E+01  | 254413004 |
| iroE [Klebsiella pneumoniae]  | 49 | 0.48 | 3.75E-38  | 353570067 | 0.04 | 1.90E+01  | 227875198 |
| iroE [Klebsiella pneumoniae]  | 50 | 0.48 | 4.62E-38  | 198243714 | 0.04 | 1.14E+01  | 152968329 |
| secernin-3 [Myotis lucifugus] | 1  | 0.93 | 6.08E-121 | 301769725 | 0.91 | 1.71E-117 | 344268354 |
| secernin-3 [Myotis lucifugus] | 2  | 0.93 | 1.04E-120 | 281348304 | 0.92 | 8.90E-120 | 194222320 |
| secernin-3 [Myotis lucifugus] | 3  | 0.92 | 8.90E-120 | 194222320 | 0.91 | 2.23E-118 | 296490700 |
| secernin-3 [Myotis lucifugus] | 4  | 0.93 | 4.68E-120 | 57110813  | 0.91 | 4.24E-118 | 115495695 |
| secernin-3 [Myotis lucifugus] | 5  | 0.91 | 2.23E-118 | 296490700 | 0.93 | 1.04E-120 | 281348304 |
| secernin-3 [Myotis lucifugus] | 6  | 0.91 | 4.24E-118 | 115495695 | 0.93 | 6.08E-121 | 301769725 |
| secernin-3 [Myotis lucifugus] | 7  | 0.91 | 1.71E-117 | 344268354 | 0.93 | 4.68E-120 | 57110813  |
| secernin-3 [Myotis lucifugus] | 8  | 0.90 | 3.83E-116 | 109100111 | 0.90 | 3.83E-116 | 109100111 |
| secernin-3 [Myotis lucifugus] | 9  | 0.89 | 1.41E-115 | 296204486 | 0.89 | 1.53E-115 | 380791835 |
| secernin-3 [Myotis lucifugus] | 10 | 0.89 | 2.97E-115 | 38504671  | 0.89 | 2.97E-115 | 38504671  |
| secernin-3 [Myotis lucifugus] | 11 | 0.89 | 1.53E-115 | 380791835 | 0.89 | 9.73E-115 | 111601409 |
| secernin-3 [Myotis lucifugus] | 12 | 0.89 | 2.02E-115 | 332209358 | 0.87 | 3.13E-112 | 395837305 |
| secernin-3 [Myotis lucifugus] | 13 | 0.89 | 5.97E-115 | 397507616 | 0.87 | 2.05E-112 | 348585759 |
| secernin-3 [Myotis lucifugus] | 14 | 0.89 | 1.12E-115 | 291391765 | 0.89 | 1.08E-114 | 114581821 |
| secernin-3 [Myotis lucifugus] | 15 | 0.89 | 9.73E-115 | 111601409 | 0.89 | 2.02E-115 | 332209358 |
| secernin-3 [Myotis lucifugus] | 16 | 0.89 | 1.08E-114 | 114581821 | 0.87 | 1.83E-112 | 351715131 |
| secernin-3 [Myotis lucifugus] | 17 | 0.87 | 3.13E-112 | 395837305 | 0.89 | 5.97E-115 | 397507616 |
| secernin-3 [Myotis lucifugus] | 18 | 0.87 | 1.83E-112 | 351715131 | 0.89 | 1.41E-115 | 296204486 |
| secernin-3 [Myotis lucifugus] | 19 | 0.87 | 2.05E-112 | 348585759 | 0.89 | 1.12E-115 | 291391765 |
| secernin-3 [Myotis lucifugus] | 20 | 0.84 | 5.68E-109 | 297264350 | 0.84 | 2.58E-108 | 302058287 |
| secernin-3 [Myotis lucifugus] | 21 | 0.84 | 2.58E-108 | 302058287 | 0.84 | 3.17E-108 | 332209360 |
| secernin-3 [Myotis lucifugus] | 22 | 0.84 | 4.91E-108 | 397507618 | 0.84 | 5.68E-109 | 297264350 |
| secernin-3 [Myotis lucifugus] | 23 | 0.84 | 3.17E-108 | 332209360 | 0.83 | 9.35E-108 | 332814760 |
| secernin-3 [Myotis lucifugus] | 24 | 0.83 | 1.44E-107 | 354505419 | 0.84 | 4.91E-108 | 397507618 |
| secernin-3 [Myotis lucifugus] | 25 | 0.83 | 9.35E-108 | 332814760 | 0.83 | 1.44E-107 | 354505419 |
| secernin-3 [Myotis lucifugus] | 26 | 0.80 | 1.32E-103 | 61969660  | 0.80 | 1.32E-103 | 61969660  |
| secernin-3 [Myotis lucifugus] | 27 | 0.80 | 1.07E-103 | 149022245 | 0.80 | 2.79E-103 | 15929748  |



|                                                   |    |      |           |           |      |           |           |
|---------------------------------------------------|----|------|-----------|-----------|------|-----------|-----------|
| secernin-3 [Myotis lucifugus]                     | 28 | 0.80 | 2.79E-103 | 15929748  | 0.72 | 9.78E-93  | 119631548 |
| secernin-3 [Myotis lucifugus]                     | 29 | 0.80 | 1.00E-102 | 74153182  | 0.80 | 1.00E-102 | 74153182  |
| secernin-3 [Myotis lucifugus]                     | 30 | 0.77 | 3.97E-99  | 395519795 | 0.77 | 3.97E-99  | 395519795 |
| secernin-3 [Myotis lucifugus]                     | 31 | 0.74 | 1.00E-95  | 383087724 | 0.80 | 1.07E-103 | 149022245 |
| secernin-3 [Myotis lucifugus]                     | 32 | 0.75 | 7.65E-97  | 126326616 | 0.75 | 5.94E-96  | 149639530 |
| secernin-3 [Myotis lucifugus]                     | 33 | 0.74 | 5.59E-95  | 327283502 | 0.57 | 5.67E-73  | 62914002  |
| secernin-3 [Myotis lucifugus]                     | 34 | 0.75 | 5.94E-96  | 149639530 | 0.57 | 2.08E-72  | 148695178 |
| secernin-3 [Myotis lucifugus]                     | 35 | 0.72 | 9.78E-93  | 119631548 | 0.74 | 5.59E-95  | 327283502 |
| secernin-3 [Myotis lucifugus]                     | 36 | 0.74 | 3.26E-95  | 224055113 | 0.63 | 1.11E-80  | 301610221 |
| secernin-3 [Myotis lucifugus]                     | 37 | 0.65 | 9.04E-83  | 41054327  | 0.64 | 2.14E-82  | 348519679 |
| secernin-3 [Myotis lucifugus]                     | 38 | 0.64 | 1.17E-81  | 163914461 | 0.64 | 1.17E-81  | 163914461 |
| secernin-3 [Myotis lucifugus]                     | 39 | 0.63 | 1.11E-80  | 301610221 | 0.02 | 5.83E+01  | 358391805 |
| secernin-3 [Myotis lucifugus]                     | 40 | 0.63 | 3.32E-80  | 94482839  | 0.02 | 1.08E+02  | 390350007 |
| secernin-3 [Myotis lucifugus]                     | 41 | 0.64 | 2.14E-82  | 348519679 | 0.02 | 5.24E+01  | 302916981 |
| secernin-3 [Myotis lucifugus]                     | 42 | 0.62 | 3.17E-79  | 61557143  | 0.03 | 2.97E+01  | 340372503 |
| secernin-3 [Myotis lucifugus]                     | 43 | 0.57 | 5.67E-73  | 62914002  | 0.03 | 3.34E+01  | 325145043 |
| secernin-3 [Myotis lucifugus]                     | 44 | 0.58 | 5.08E-74  | 47218098  | 0.02 | 1.89E+02  | 358366518 |
| secernin-3 [Myotis lucifugus]                     | 45 | 0.57 | 2.08E-72  | 148695178 | 0.03 | 6.15E+00  | 326917505 |
| secernin-3 [Myotis lucifugus]                     | 46 | 0.56 | 7.73E-72  | 311272660 | 0.02 | 4.93E+01  | 322710652 |
| secernin-3 [Myotis lucifugus]                     | 47 | 0.55 | 8.38E-70  | 395826584 | 0.03 | 8.51E+00  | 342874004 |
| secernin-3 [Myotis lucifugus]                     | 48 | 0.55 | 1.63E-69  | 327275780 | 0.02 | 8.59E+01  | 147864006 |
| secernin-3 [Myotis lucifugus]                     | 49 | 0.56 | 1.52E-70  | 126308319 | 0.02 | 8.02E+01  | 308469783 |
| secernin-3 [Myotis lucifugus]                     | 50 | 0.55 | 6.04E-70  | 326934081 | 0.02 | 6.33E+01  | 345487083 |
| steroidogenic factor 1 isoform X2 [Camelus ferus] | 1  | 0.86 | 1.45E-114 | 395824169 | 0.95 | 1.62E-127 | 325495571 |
| steroidogenic factor 1 isoform X2 [Camelus ferus] | 2  | 0.88 | 4.90E-117 | 160221327 | 0.88 | 4.90E-117 | 160221327 |
| steroidogenic factor 1 isoform X2 [Camelus ferus] | 3  | 0.87 | 5.20E-116 | 47523442  | 0.88 | 2.58E-117 | 27806027  |
| steroidogenic factor 1 isoform X2 [Camelus ferus] | 4  | 0.87 | 7.18E-116 | 344271937 | 0.87 | 5.20E-116 | 47523442  |
| steroidogenic factor 1 isoform X2 [Camelus ferus] | 5  | 0.88 | 2.58E-117 | 27806027  | 0.87 | 7.18E-116 | 344271937 |
| steroidogenic factor 1 isoform X2 [Camelus ferus] | 6  | 0.85 | 4.25E-114 | 300797824 | 0.86 | 1.45E-114 | 395824169 |
| steroidogenic factor 1 isoform X2 [Camelus ferus] | 7  | 0.95 | 1.62E-127 | 325495571 | 0.85 | 5.00E-113 | 332229985 |
| steroidogenic factor 1 isoform X2 [Camelus ferus] | 8  | 0.85 | 4.96E-114 | 149047896 | 0.84 | 1.46E-112 | 20070193  |
| steroidogenic factor 1 isoform X2 [Camelus ferus] | 9  | 0.85 | 1.38E-113 | 20522231  | 0.85 | 4.25E-114 | 300797824 |
| steroidogenic factor 1 isoform X2 [Camelus ferus] | 10 | 0.85 | 2.13E-113 | 74142710  | 0.84 | 1.06E-112 | 297685326 |
| steroidogenic factor 1 isoform X2 [Camelus ferus] | 11 | 0.84 | 1.82E-112 | 354499096 | 0.83 | 3.52E-111 | 10945629  |
| steroidogenic factor 1 isoform X2 [Camelus ferus] | 12 | 0.83 | 3.52E-111 | 10945629  | 0.84 | 9.53E-113 | 109110256 |
| steroidogenic factor 1 isoform X2 [Camelus ferus] | 13 | 0.84 | 8.19E-112 | 1805353   | 0.84 | 3.85E-112 | 216409744 |
| steroidogenic factor 1 isoform X2 [Camelus ferus] | 14 | 0.85 | 5.00E-113 | 332229985 | 0.86 | 6.84E-115 | 351702108 |
| steroidogenic factor 1 isoform X2 [Camelus ferus] | 15 | 0.87 | 7.18E-116 | 126352395 | 0.85 | 6.12E-113 | 301769265 |
| steroidogenic factor 1 isoform X2 [Camelus ferus] | 16 | 0.84 | 9.53E-113 | 109110256 | 0.84 | 1.63E-112 | 384940122 |
| steroidogenic factor 1 isoform X2 [Camelus ferus] | 17 | 0.85 | 5.85E-113 | 397473205 | 0.84 | 2.79E-112 | 2077920   |
| steroidogenic factor 1 isoform X2 [Camelus ferus] | 18 | 0.84 | 1.63E-112 | 384940122 | 0.87 | 7.18E-116 | 126352395 |
| steroidogenic factor 1 isoform X2 [Camelus ferus] | 19 | 0.84 | 1.46E-112 | 20070193  | 0.85 | 1.38E-113 | 20522231  |

|                                                      |    |      |           |           |      |           |           |
|------------------------------------------------------|----|------|-----------|-----------|------|-----------|-----------|
| steroidogenic factor 1 isoform X2<br>[Camelus ferus] | 20 | 0.84 | 1.06E-112 | 297685326 | 0.85 | 2.13E-113 | 74142710  |
| steroidogenic factor 1 isoform X2<br>[Camelus ferus] | 21 | 0.84 | 1.11E-112 | 297270159 | 0.84 | 8.19E-112 | 1805353   |
| steroidogenic factor 1 isoform X2<br>[Camelus ferus] | 22 | 0.84 | 2.79E-112 | 2077920   | 0.76 | 6.80E-101 | 355567920 |
| steroidogenic factor 1 isoform X2<br>[Camelus ferus] | 23 | 0.84 | 3.85E-112 | 216409744 | 0.84 | 1.82E-112 | 354499096 |
| steroidogenic factor 1 isoform X2<br>[Camelus ferus] | 24 | 0.85 | 6.20E-113 | 348570102 | 0.85 | 6.20E-113 | 348570102 |
| steroidogenic factor 1 isoform X2<br>[Camelus ferus] | 25 | 0.85 | 6.12E-113 | 301769265 | 0.85 | 4.96E-114 | 149047896 |
| steroidogenic factor 1 isoform X2<br>[Camelus ferus] | 26 | 0.86 | 6.84E-115 | 351702108 | 0.84 | 1.11E-112 | 297270159 |
| steroidogenic factor 1 isoform X2<br>[Camelus ferus] | 27 | 0.83 | 1.43E-110 | 345805854 | 0.85 | 5.85E-113 | 397473205 |
| steroidogenic factor 1 isoform X2<br>[Camelus ferus] | 28 | 0.76 | 6.80E-101 | 355567920 | 0.83 | 1.43E-110 | 345805854 |
| steroidogenic factor 1 isoform X2<br>[Camelus ferus] | 29 | 0.71 | 8.06E-94  | 49036491  | 0.66 | 4.93E-87  | 334311611 |
| steroidogenic factor 1 isoform X2<br>[Camelus ferus] | 30 | 0.76 | 4.40E-101 | 332832881 | 0.71 | 8.06E-94  | 49036491  |
| steroidogenic factor 1 isoform X2<br>[Camelus ferus] | 31 | 0.66 | 4.93E-87  | 334311611 | 0.76 | 4.40E-101 | 332832881 |
| steroidogenic factor 1 isoform X2<br>[Camelus ferus] | 32 | 0.60 | 9.24E-79  | 4586618   | 0.68 | 4.11E-90  | 296190799 |
| steroidogenic factor 1 isoform X2<br>[Camelus ferus] | 33 | 0.59 | 9.80E-78  | 115334528 | 0.57 | 2.70E-75  | 395505691 |
| steroidogenic factor 1 isoform X2<br>[Camelus ferus] | 34 | 0.59 | 7.90E-78  | 45384188  | 0.59 | 9.80E-78  | 115334528 |
| steroidogenic factor 1 isoform X2<br>[Camelus ferus] | 35 | 0.58 | 8.89E-76  | 115529250 | 0.60 | 9.24E-79  | 4586618   |
| steroidogenic factor 1 isoform X2<br>[Camelus ferus] | 36 | 0.59 | 5.48E-77  | 168479587 | 0.59 | 7.90E-78  | 45384188  |
| steroidogenic factor 1 isoform X2<br>[Camelus ferus] | 37 | 0.56 | 3.42E-74  | 4104218   | 0.59 | 5.48E-77  | 168479587 |
| steroidogenic factor 1 isoform X2<br>[Camelus ferus] | 38 | 0.54 | 2.97E-71  | 291565556 | 0.56 | 1.15E-73  | 345326142 |
| steroidogenic factor 1 isoform X2<br>[Camelus ferus] | 39 | 0.54 | 5.65E-71  | 4126870   | 0.56 | 3.42E-74  | 4104218   |
| steroidogenic factor 1 isoform X2<br>[Camelus ferus] | 40 | 0.56 | 1.15E-73  | 345326142 | 0.58 | 8.89E-76  | 115529250 |
| steroidogenic factor 1 isoform X2<br>[Camelus ferus] | 41 | 0.54 | 4.09E-71  | 224809509 | 0.46 | 2.48E-59  | 327290547 |
| steroidogenic factor 1 isoform X2<br>[Camelus ferus] | 42 | 0.54 | 5.07E-71  | 148224522 | 0.44 | 1.84E-57  | 24158439  |
| steroidogenic factor 1 isoform X2<br>[Camelus ferus] | 43 | 0.68 | 4.11E-90  | 296190799 | 0.45 | 3.81E-58  | 66356139  |
| steroidogenic factor 1 isoform X2<br>[Camelus ferus] | 44 | 0.53 | 1.95E-69  | 44355486  | 0.46 | 1.83E-59  | 15145791  |
| steroidogenic factor 1 isoform X2<br>[Camelus ferus] | 45 | 0.57 | 2.70E-75  | 395505691 | 0.53 | 1.95E-69  | 44355486  |
| steroidogenic factor 1 isoform X2<br>[Camelus ferus] | 46 | 0.68 | 5.00E-90  | 149047895 | 0.47 | 4.13E-61  | 1947098   |
| steroidogenic factor 1 isoform X2<br>[Camelus ferus] | 47 | 0.68 | 1.25E-89  | 425578    | 0.47 | 2.80E-61  | 281351212 |
| steroidogenic factor 1 isoform X2<br>[Camelus ferus] | 48 | 0.68 | 7.42E-90  | 148694876 | 0.43 | 1.23E-55  | 218683821 |
| steroidogenic factor 1 isoform X2<br>[Camelus ferus] | 49 | 0.67 | 4.13E-89  | 220401    | 0.45 | 1.89E-58  | 14010847  |
| steroidogenic factor 1 isoform X2<br>[Camelus ferus] | 50 | 0.48 | 2.80E-62  | 350537337 | 0.46 | 5.21E-59  | 13492975  |

The table shows the top 50 results of BLASTp and RAFTS3 for 5 sequences randomly selected from the test dataset compared against NR. The subject sequences are indicated by their GI number and ordered by the default criteria of each tool; the relative score of each one was calculated.
